# Supplementary material for: eIF4E binding protein 1 expression is associated with clinical survival outcomes in colorectal cancer
Source: PubMed Central journal article supplement (PMC4695172; doi:10.18632/oncotarget.4483), 2015-06-29
Supplement: oncotarget-06-24092-s001.pdf [file oncotarget-06-24092-s001.pdf]

SUPPLEMENTARY FIGURES AND TABLE

(A)

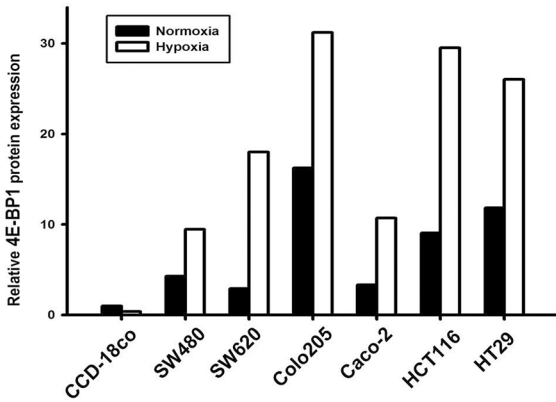

(B)

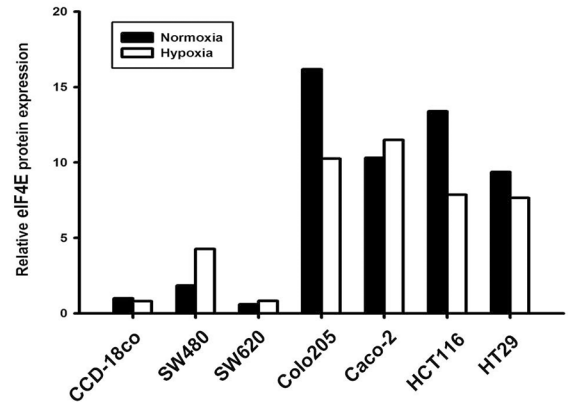

(C)

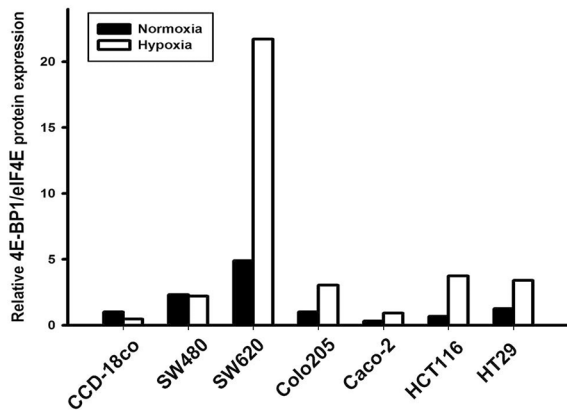

(D)

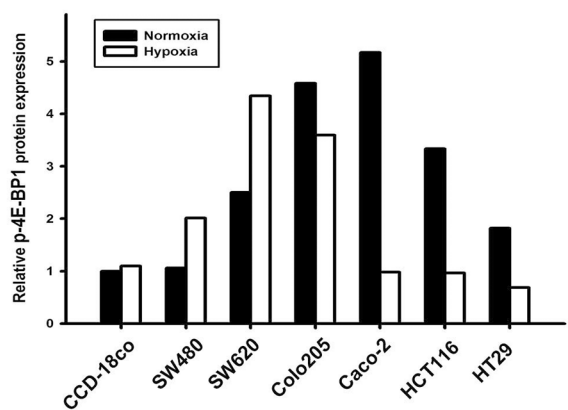

Supplementary Figure S1: Compare basal expression of 4E-BP1, eIF4E and p-4E-BP1 in normal colon cell line and colorectal cancer cells under normoxia and hypoxia. The quantitative results of A. 4E-BP1, B. eIF4E, and D. p-4E-BP1 expression and C. the ratio of 4E-BP1:eIF4E in normal colon cell line and colorectal cancer cells under normoxia and hypoxia.

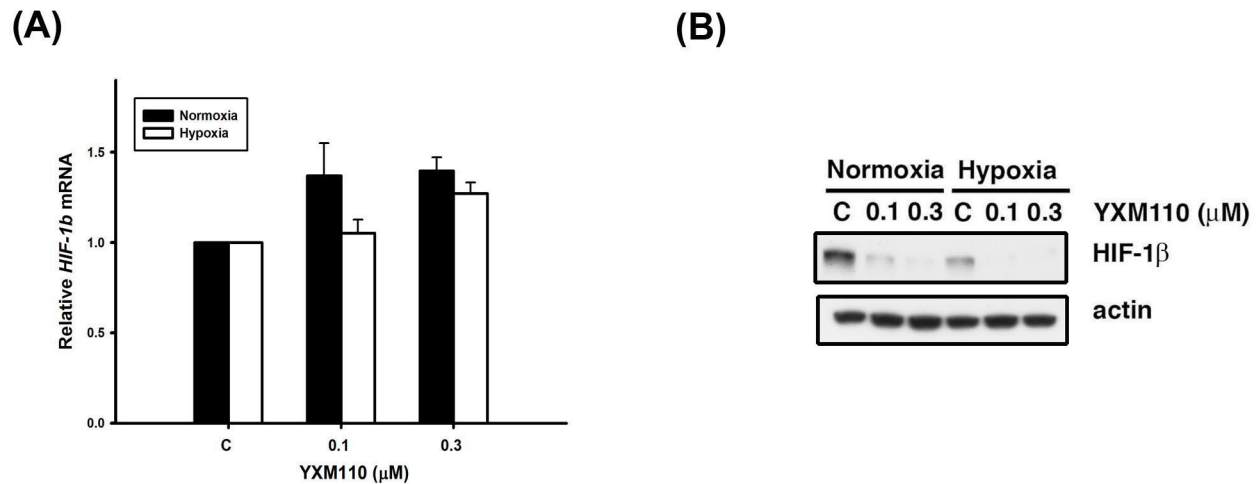

**Supplementary Figure S2: YXM110 inhibits HIF-1 $\beta$  protein levels.** **A.** HIF-1 $\beta$  mRNA was analyzed with quantitative real-time RT-PCR after 6 h treatment of YXM110 (0.1 or 0.3  $\mu$ M) under normoxia or hypoxia conditions. **B.** HCT116 cells were treated with vehicle (0.1% DMSO) or YXM110 (0.1 or 0.3  $\mu$ M) under normoxia or hypoxia conditions for 24 h. The cells were then harvested for detection of HIF-1 $\beta$  and actin by western blot analysis.

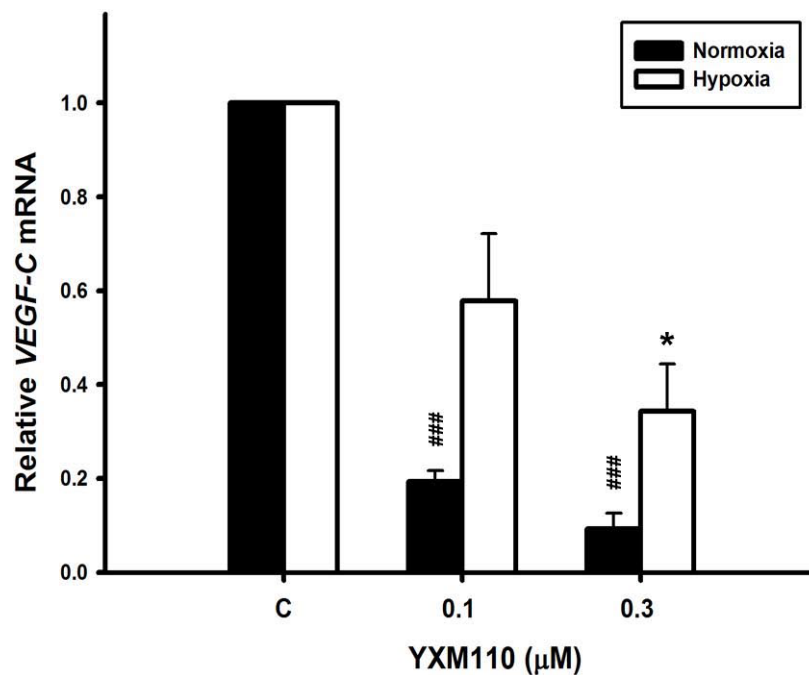

**Supplementary Figure S3: YXM110 suppresses VEGF-C transcriptional level.** VEGF-C mRNA was analyzed with quantitative real-time RT-PCR after 6 h treatment of YXM110 (0.1 or 0.3  $\mu$ M) under normoxia or hypoxia conditions.. <sup>\*</sup> $P < 0.01$ ; <sup>###</sup> $P < 0.001$ .

**Supplementary Table S1: The correlation of 4EBP1 and eIF4E expression in tumor tissues of CRC**

|                       | 4EBP1                   |                          | <i>p</i> value |
|-----------------------|-------------------------|--------------------------|----------------|
|                       | Low<br>( <i>n</i> = 30) | High<br>( <i>n</i> = 30) |                |
| eIF4E                 |                         |                          |                |
| Low ( <i>n</i> = 35)  | 25                      | 10                       |                |
| High ( <i>n</i> = 25) | 5                       | 20                       | <0.0001        |

No positive or only one positively stained section was defined as “low” expression of 4E-BP1 or eIF4E, and the presence of at least two positively stained sections was classified as “high” expression. (*N* = 60).
